# Supplementary material for: An Improved Method of an Image Mosaic of a Tea Garden and Tea Tree Target Extraction
Source: MDPI journal article supplement (doi:10.3390/agriengineering4010017), 2022-02-25
Supplement: s1 [file s1]

Archive with 1 entries (1 files):
- agriengineering-1579561-supplementary.pdf
